1 **Structural basis for the inhibition of SARS-CoV-2 main protease by**  
2 **antineoplastic drug Carmofur**

3 Zhenming Jin<sup>1,2\*</sup>, Yao Zhao<sup>1\*</sup>, Yuan Sun<sup>3\*</sup>, Bing Zhang<sup>1</sup>, Haofeng Wang<sup>1,4</sup>, Yan Wu<sup>3</sup>,  
4 Yan Zhu<sup>1</sup>, Chen Zhu<sup>1</sup>, Tianyu Hu<sup>1</sup>, Xiaoyu Du<sup>1,2</sup>, Yinkai Duan<sup>1</sup>, Jing Yu<sup>1</sup>, Xiaobao  
5 Yang<sup>1</sup>, Xiuna Yang<sup>1</sup>, Kailin Yang<sup>5</sup>, Xiang Liu<sup>6</sup>, Luke W. Guddat<sup>7</sup>, Gengfu Xiao<sup>3</sup>, Leike  
6 Zhang<sup>3†</sup>, Haitao Yang<sup>1†</sup> & Zihe Rao<sup>1,2,6</sup>

7 <sup>1</sup>Shanghai Institute for Advanced Immunochemical Studies and School of Life Science  
8 and Technology, ShanghaiTech University, Shanghai, China.

9 <sup>2</sup>Laboratory of Structural Biology, School of Life Sciences and School of Medicine,  
10 Tsinghua University, Beijing, China.

11 <sup>3</sup>State Key Laboratory of Virology, Wuhan Institute of Virology, Center for Biosafety  
12 Mega-Science, Chinese Academy of Sciences, Wuhan, China.

13 <sup>4</sup>School of Life Sciences, Tianjin University, Tianjin, China.

14 <sup>5</sup>Taussig Cancer Center, Cleveland Clinic, Cleveland, OH, USA.

15 <sup>6</sup>State Key Laboratory of Medicinal Chemical Biology, Frontiers Science Center for  
16 Cell Response, College of Life Sciences, College of Pharmacy, Nankai University,  
17 Tianjin, China.

18 <sup>7</sup>School of Chemistry and Molecular Biosciences, the University of Queensland,  
19 Brisbane, Australia.

20 \*These authors contributed equally: Zhenming Jin, Yao Zhao and Yuan Sun.

21 †e-mail: [zhangleike@wh.iov.cn](mailto:zhangleike@wh.iov.cn); [yanght@shanghaitech.edu.cn](mailto:yanght@shanghaitech.edu.cn)

22

23 **Abstract**

24 The antineoplastic drug Carmofur was shown to inhibit SARS-CoV-2 main protease  
25 ( $M^{\text{pro}}$ ). Here the X-ray crystal structure of  $M^{\text{pro}}$  in complex with Carmofur reveals that  
26 the carbonyl reactive group of Carmofur is covalently bound to catalytic Cys145,  
27 whereas its fatty acid tail occupies the hydrophobic S2 subsite. Carmofur inhibits viral  
28 replication in cells ( $EC_{50} = 24.30 \mu\text{M}$ ) and it is a promising lead compound to develop  
29 new antiviral treatment for COVID-19.

30

31 COVID-19, a highly infectious viral disease, has spread since its appearance in  
32 December 2019, causing an unprecedented pandemic. The number of confirmed cases  
33 worldwide continues to grow at a rapid rate, but there are no specific drugs or vaccines  
34 available to control symptoms or the spread of this disease at this time.

35 The etiological agent of the disease is the coronavirus SARS-CoV-2. This virus has  
36 a ~30,000 nt RNA genome. The N-terminus of the viral genome encodes two  
37 translational products, polyproteins 1a and 1ab (pp1a and pp1ab)<sup>1,2</sup>, which are  
38 processed into mature non-structural proteins, by the main protease (M<sup>pro</sup>) and a papain-  
39 like protease<sup>3</sup>. M<sup>pro</sup> has been proposed as a therapeutic target for anti-coronavirus (CoV)  
40 drug development<sup>4-6</sup>. We previously screened over 10,000 compounds and identified  
41 Carmofur as compound that can inhibit M<sup>pro</sup> *in vitro*, with an IC<sub>50</sub> of 1.82 μM<sup>7</sup>.

42 Carmofur (1-hexylcarbamoyl-5-fluorouracil) is a derivative of 5-fluorouracil (5-  
43 FU) (Fig. 1a) and an approved antineoplastic agent. Carmofur has been used to treat  
44 colorectal cancer since 1980s<sup>8</sup>, and has shown clinical benefits on breast, gastric, and  
45 bladder cancers<sup>9-11</sup>. The target for Carmofur is believed to be thymidylate synthase<sup>12,13</sup>,  
46 but it has also been shown to inhibit human acid ceramidase (AC)<sup>14</sup>, through covalent  
47 modification of its catalytic cysteine<sup>15</sup>.

48 The molecular details for how Carmofur inhibits M<sup>pro</sup> activity were unresolved.  
49 Here, we present the 1.6 Å X-ray crystal structure of SARS-CoV-2 M<sup>pro</sup> in complex  
50 with Carmofur (Fig. 1b, c and Supplementary Table 1). In agreement with previous  
51 studies<sup>4,5,16-18</sup>, M<sup>pro</sup> forms a homodimer (protomer A and B) related by crystallographic  
52 symmetry (Extended Data Fig. 1a, b). All of the residues (1–306) in the polypeptide  
53 could be traced in the electron density map. Each protomer is composed of three  
54 domains (Fig. 1c): domain I (residues 10–99), domain II (residues 100–184), and  
55 domain III (residues 201–303); and a long loop region (residues 185–200) connects  
56 domains II and III. The substrate-binding pocket lies in the cleft between domain I and  
57 domain II feature the catalytic dyad residues Cys145 and His41 (Fig. 1c, d). The  
58 substrate-binding pocket is divided into a series of subsites (including S1, S2, S4, and  
59 S1'), each accommodating a single but consecutive amino acid residue in the substrate.  
60 The first residue serine of one protomer interacts with residue Phe140 and Glu166 of  
61 the other protomer to stabilize the S1 subsite (Extended Data Fig. 1c), and this structural  
62 feature is essential for catalysis<sup>7</sup>.

63 The electron density map unambiguously shows that the fatty acid moiety  
64 (C<sub>7</sub>H<sub>14</sub>NO) of Carmofur is linked to the S<sub>γ</sub> atom of Cys145 through a 1.8 Å covalent

65 bond, whereas the fatty acid tail is inserted into the S2 subsite (Fig. 1d, e). This  
66 observation suggests that the sulfhydryl group of Cys145 attacks the electrophilic  
67 carbonyl group of Carmofur, resulting in covalent modification of the cysteine residue  
68 and release of the 5-fluorouracil moiety (Fig. 1b and Extended Data Fig. 2a). In addition  
69 to the C-S covalent bond (highlighted in Fig. 1e), the inhibitor is stabilized by numerous  
70 hydrogen bonds and hydrophobic interactions (Fig. 1e and Extended Data Fig. 2b). The  
71 carbonyl oxygen of Carmofur occupies the oxyanion hole and forms hydrogen bonds  
72 (3.0 Å) with the backbone amides of Gly143 and Cys145, mimicking the tetrahedral  
73 oxyanion intermediate formed during protease cleavage (Fig. 1e). The fatty acid tail,  
74 which appears in an extended conformation, inserts into the bulky hydrophobic S2  
75 subsite (composed of the side chains of His41, Met49, Tyr54, Met165, and the alkyl  
76 portion of the side chain of Asp187) (Fig. 1d, e). The hydrophobic interactions are  
77 mainly contributed by the side chains of His41, Met49 and Met165, all of which run  
78 parallel with the alkyl part of the fatty acid tail of the inhibitor (Fig. 1e and Extended  
79 Data Fig. 2b).

80 The mechanism of covalent modification by Carmofur is different from that of the  
81 inhibitor N3<sup>7,19</sup>, which covalently modifies Cys145 through Michael addition of the  
82 vinyl group. The structures of M<sup>pro</sup>-Carmofur and M<sup>pro</sup>-N3 are overall similar (r.m.s.d.  
83 of 0.286 Å for all C $\alpha$  atoms). The largest conformational differences occur in the  
84 substrate binding pocket, with the backbone surrounding Carmofur in a slightly more  
85 outward position compared with the M<sup>pro</sup>-N3 complex structure (Extended Data Fig.  
86 3a). Another difference is that Carmofur only occupies the S2 subsite (Fig. 1d), whereas  
87 N3 occupies four subsites (S1, S2, S4 and S1', see Extended Data Fig. 3b, c). The lactam  
88 ring of N3 is located in the S1 subsite, which is filled by a DMSO molecule in the M<sup>pro</sup>-  
89 Carmofur structure (Extended Data Fig. 3b, c). These observations demonstrate the  
90 potential for structural elaboration of Carmofur and will be useful to design more potent  
91 derivatives against the M<sup>pro</sup> of SARS-CoV-2.

92 We previously showed that treatment with 10  $\mu$ M Ebselen (EC<sub>50</sub> = 4.67  $\mu$ M)  
93 inhibited infection of Vero cells with SARS-CoV-2 whereas Carmofur did not showed  
94 detectable antiviral activity at this concentration<sup>7</sup>. Here we determined the inhibitory  
95 effect of Carmofur against SARS-CoV-2 infection on Vero E6 cells, as previously  
96 described<sup>20</sup> (Fig. 2). By measuring viral RNA in supernatant, we determined the EC<sub>50</sub>  
97 for Carmofur as 24.30  $\mu$ M (Fig. 2a). To verify this result, we fixed infected cells and  
98 stained them using anti-sera against viral nucleocapsid protein (NP) and observed a

99 decrease in NP levels after Carmofur treatment (Fig. 2b). We also performed  
100 cytotoxicity assays for Carmofur in Vero E6 cells and determined the CC<sub>50</sub> value of  
101 133.4  $\mu$ M (Fig. 2c). Thus, Carmofur has a favorable selectivity index (SI) of 5.36, but  
102 further optimization will be required to develop into an effective drug.

103 In conclusion, the crystal structure of M<sup>Pro</sup> in complex with Carmofur shows that  
104 the compound directly modifies the catalytic Cys145 of SARS-CoV-2 M<sup>Pro</sup>. Our study  
105 also provides a basis for rational design of Carmofur analogs with enhanced inhibitory  
106 efficacy to treat COVID-19. Since M<sup>Pro</sup> is highly conserved among all CoV M<sup>Pro</sup>s,  
107 Carmofur and its analogs may be effective against a broader spectrum of coronaviruses.

## 108 References

- 109 1. Wu, F. et al. A new coronavirus associated with human respiratory disease in  
110 China. *Nature* **579**, 265-269 (2020).
- 111 2. Zhou, P. et al. A pneumonia outbreak associated with a new coronavirus of  
112 probable bat origin. *Nature* **579**, 270-273 (2020).
- 113 3. Hegyi, A. & Ziebuhr, J. Conservation of substrate specificities among  
114 coronavirus main proteases. *J Gen Virol* **83**, 595-599 (2002).
- 115 4. Anand, K. et al. Structure of coronavirus main proteinase reveals combination  
116 of a chymotrypsin fold with an extra alpha-helical domain. *Embo j* **21**, 3213-24  
117 (2002).
- 118 5. Yang, H. et al. The crystal structures of severe acute respiratory syndrome virus  
119 main protease and its complex with an inhibitor. *Proc Natl Acad Sci U S A* **100**,  
120 13190-5 (2003).
- 121 6. Pillaiyar, T., Manickam, M., Namasivayam, V., Hayashi, Y. & Jung, S.H. An  
122 Overview of Severe Acute Respiratory Syndrome-Coronavirus (SARS-CoV)  
123 3CL Protease Inhibitors: Peptidomimetics and Small Molecule Chemotherapy.  
124 *J Med Chem* **59**, 6595-628 (2016).
- 125 7. Jin, Z. et al. Structure of Mpro from COVID-19 virus and discovery of its  
126 inhibitors. *Nature* (2020).
- 127 8. Sakamoto, J. et al. An individual patient data meta-analysis of adjuvant therapy  
128 with carmofur in patients with curatively resected colon cancer. *Jpn J Clin*  
129 *Oncol* **35**, 536-44 (2005).
- 130 9. Morimoto, K. & Koh, M. Postoperative adjuvant use of carmofur for early  
131 breast cancer. *Osaka City Med J* **49**, 77-83 (2003).
- 132 10. Gröhn, P. et al. Oral carmofur in advanced gastrointestinal cancer. *Am J Clin*  
133 *Oncol* **13**, 477-9 (1990).
- 134 11. Nishio, S. et al. Study on effectiveness of carmofur (Mifuro) in urogenital  
135 carcinoma, especially bladder cancer, as a post-operative adjuvant  
136 chemotherapeutic agent. *Hinyokika Kyo* **33**, 295-303 (1987).
- 137 12. Ooi, A. et al. Plasma, intestine and tumor levels of 5-fluorouracil in mice  
138 bearing L1210 ascites tumor following oral administration of 5-fluorouracil,  
139 UFT (mixed compound of tegafur and uracil), carmofur and 5'-deoxy-5-  
140 fluorouridine. *Biol Pharm Bull* **24**, 1329-31 (2001).
- 141 13. Sato, S., Ueyama, T., Fukui, H., Miyazaki, K. & Kuwano, M. Anti-tumor effects  
142 of carmofur on human 5-FU resistant cells. *Gan To Kagaku Ryoho* **26**, 1613-6

- 143 (1999).  
144 14. Nguyen, H.S., Awad, A.J., Shabani, S. & Doan, N. Molecular Targeting of Acid  
145 Ceramidase in Glioblastoma: A Review of Its Role, Potential Treatment, and  
146 Challenges. *Pharmaceutics* **10**(2018).  
147 15. Dementiev, A. et al. Molecular Mechanism of Inhibition of Acid Ceramidase by  
148 Carmofur. *J Med Chem* **62**, 987-992 (2019).  
149 16. Xue, X. et al. Structures of two coronavirus main proteases: implications for  
150 substrate binding and antiviral drug design. *J Virol* **82**, 2515-27 (2008).  
151 17. Ren, Z. et al. The newly emerged SARS-like coronavirus HCoV-EMC also has  
152 an "Achilles' heel": current effective inhibitor targeting a 3C-like protease.  
153 *Protein Cell* **4**, 248-50 (2013).  
154 18. Wang, F., Chen, C., Tan, W., Yang, K. & Yang, H. Structure of Main Protease  
155 from Human Coronavirus NL63: Insights for Wide Spectrum Anti-Coronavirus  
156 Drug Design. *Sci Rep* **6**, 22677 (2016).  
157 19. Yang, H. et al. Design of wide-spectrum inhibitors targeting coronavirus main  
158 proteases. *PLoS Biol* **3**, e324 (2005).  
159 20. Wang, M. et al. Remdesivir and chloroquine effectively inhibit the recently  
160 emerged novel coronavirus (2019-nCoV) in vitro. *Cell Res* **30**, 269-271 (2020).  
161

162

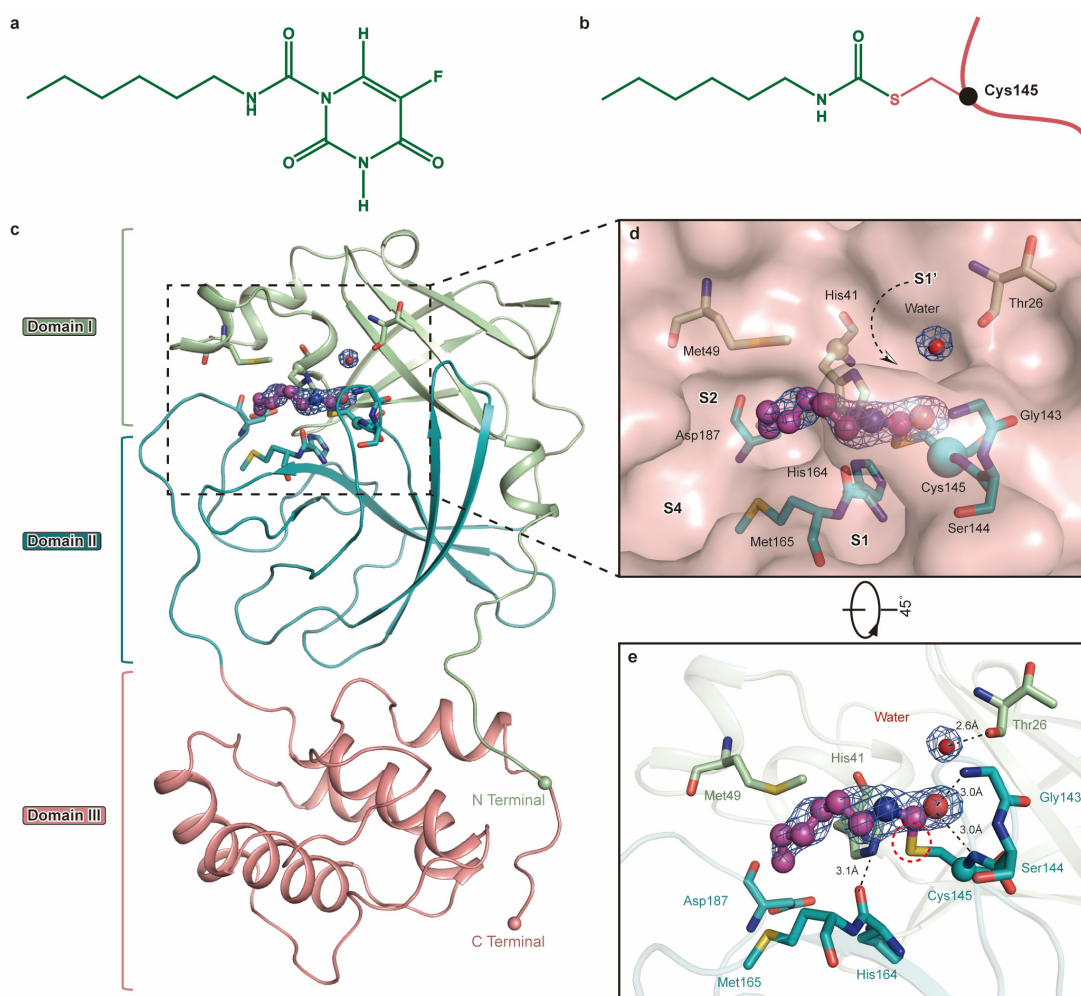

163

164 **Fig. 1 | SARS-CoV-2 M<sup>pro</sup> in complex with Carmofur.** **a**, The chemical structure of  
165 Carmofur. **b**, The binding mode of Carmofur to SARS-CoV-2 M<sup>pro</sup>. The red curve  
166 represents SARS-CoV-2 M<sup>pro</sup> polypeptide with the sidechain of Cys145 protruding. **c**,  
167 The structure of a single protomer. The three domains are shown in three different  
168 colors. The catalytic center is located within the dashed square. **d**, Zoom in of the  
169 catalytic center. The residues that participate in Carmofur binding are shown as stick  
170 models. Carmofur is show as a ball-and-stick model with the carbons in magenta. Water  
171 is presented as a red sphere. **e**, A rotated view of the binding site, but with the surface  
172 removed. The red dashed circle highlights the C-S covalent bond.

173



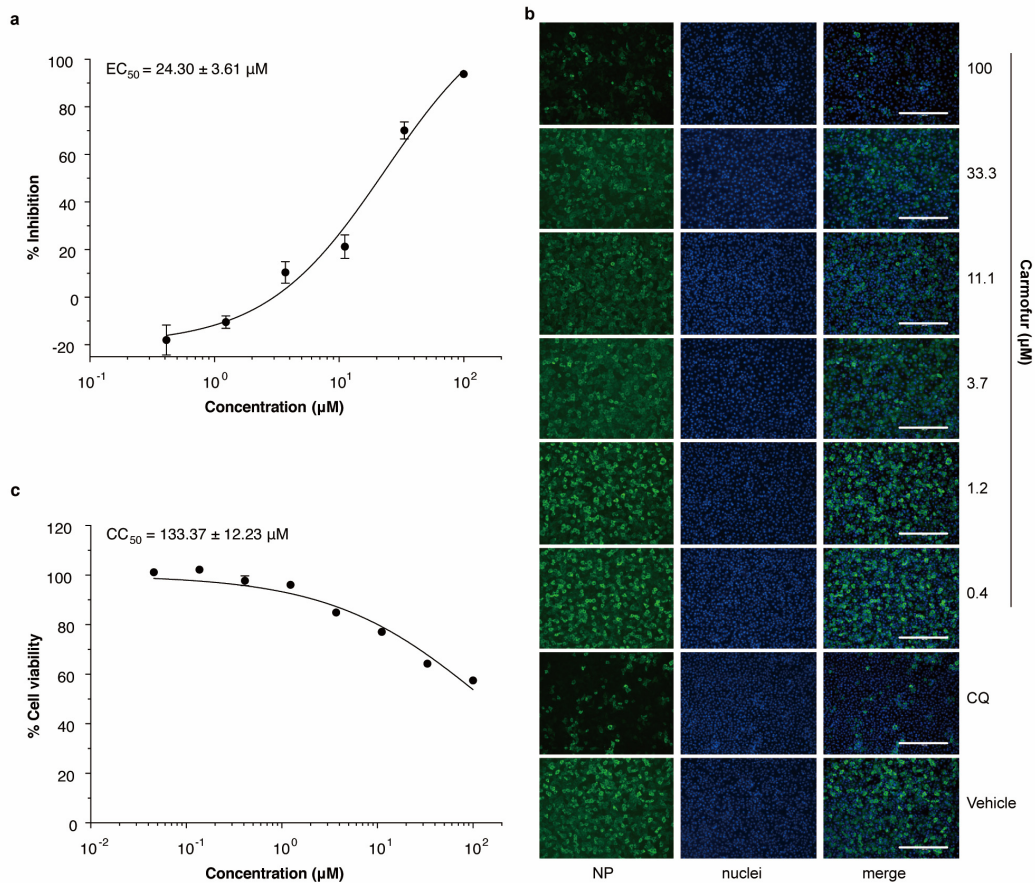

174

175 **Fig. 2 | Inhibition of SARS-CoV-2 by Carmofur in Vero E6 cells.** Vero E6 cells  
176 infected with SARS-CoV-2 at a MOI of 0.05 were treated with different concentrations  
177 of Carmofur. **a**, qRT-PCR assays were performed to measure viral copy number from  
178 cellular supernatant. The Y-axis of the graph indicates percentage inhibition of virus  
179 relative to DMSO (vehicle) treated sample. Data was shown as mean ± s.e.m., n = 6  
180 biological replicates. **b**, Immunofluorescence for intracellular NP. At 24 hours post  
181 infection, cells were fixed, and intracellular NP levels were monitored by  
182 immunofluorescence. Chloroquine (CQ, 10 μM) was used as a positive control. Results  
183 are shown as representative of three biological replicates. Bars: 400 μm. **c**, Cell viability  
184 was measured using a Cell Counting Kit-8 (a commonly used kit for quantitation of  
185 viable cell number to measure proliferation and cytotoxicity) assay. The Y-axis  
186 represents percentage of cell viability relative to DMSO (vehicle) treated sample. Data  
187 was shown as mean ± s.e.m., n = 3 biological replicates. Data for graphs in **a** and **c** are  
188 available as source data.



189 **Methods**

190 **Cloning, protein expression and purification of SARS-CoV-2 M<sup>Pro</sup>.** The cell cultures  
191 were grown and the protein expressed according to a previous report<sup>7</sup>. The cell pellets  
192 were resuspended in lysis buffer (20mM Tris-HCl pH 8.0, 150 mM NaCl, 5% Glycerol),  
193 lysed by high-pressure homogenization, and then centrifuged at 25,000g for 30 min.  
194 The supernatant was loaded onto Ni-NTA affinity column (Qiagen, Germany), and  
195 washed by the lysis buffer containing 20 mM imidazole. The His-tagged M<sup>Pro</sup> was  
196 eluted by lysis buffer that included 300 mM imidazole. The imidazole was then  
197 removed through desalting. Human rhinovirus 3C protease was added to remove the C-  
198 terminal His tag. SARS-CoV-2 M<sup>Pro</sup> was further purified by ion exchange  
199 chromatography. The purified M<sup>Pro</sup> was transferred to 10 mM Tris-HCl pH 8.0 through  
200 desalting and stored at -80 degrees until needed.

201 **Crystallization, data collection and structure determination.** SARS-CoV-2 M<sup>Pro</sup>  
202 was concentrated to 5 mg/ml incubated with 0.3 mM Carmofur (Selleck, USA) for 1  
203 hour and the complex was crystallized by hanging drop vapor diffusion method at 20 °C.  
204 The best crystals were grown using a well buffer containing 0.1 M MES pH 6.0, 5%  
205 polyethylene glycol (PEG) 6000, and 3% DMSO. The cryo-protectant solution was the  
206 reservoir but with 20% glycerol added.

207 X-ray data were collected on beamline BL17U1 at Shanghai Synchrotron  
208 Radiation Facility (SSRF) at 100 K and at a wavelength of 0.97918 Å using an Eiger X  
209 16M image plate detector. Data integration and scaling were performed using the  
210 program XDS<sup>21</sup>. The structure was determined by molecular replacement (MR) with  
211 the PHASER<sup>22</sup> and Phenix 1.17.1<sup>23</sup> using the SARS-CoV-2 M<sup>Pro</sup> (PDB ID: 6LU7) as a  
212 search template. The model from MR was subsequently subjected to iterative cycles of  
213 manual model adjustment with Coot 0.8<sup>24</sup> and refinement was completed with Phenix  
214 REFINE<sup>25</sup>. The inhibitor, Carmofur, was built according to the omit map. The phasing  
215 and refinement statistics are summarized in Supplementary Table 1.

216 **Antiviral and cytotoxicity assays for Carmofur.** A clinical isolate of SARS-CoV-2  
217 (nCoV-2019BetaCoV/Wuhan/WIV04/2019) was propagated in Vero E6 cells, and viral  
218 titer was determined as described previously<sup>20</sup>. Vero E6 cells were from ATCC with  
219 authentication. The authentication was performed by morphology check under  
220 microscopes and growth curve analysis. We confirm that all cells were tested as

221 mycoplasma negative. For the antiviral assay, pre-seeded Vero E6 cells ( $5 \times 10^4$   
222 cells/well) were pre-treated with the different concentration of Carmofur for 1 h and the  
223 virus was subsequently added (MOI of 0.05) to allow infection for 1 h. Next, the virus-  
224 drug mixture was removed, and cells were further cultured with fresh drug containing  
225 medium. At 24 h post infection, the cell supernatant was collected and vRNA in  
226 supernatant was subjected to qRT-PCR analysis, while cells were fixed and subjected  
227 to immunofluorescence to monitor intracellular NP level as described previously<sup>20</sup>. For  
228 cytotoxicity assays, Vero E6 cells were suspended in growth medium in 96-well plates.  
229 The next day, appropriate concentrations of Carmofur were added to the medium. After  
230 24 h, the relative numbers of surviving cells were measured by the CCK8 (Beyotime,  
231 China) assay in accordance with the manufacturer's instructions. All experiments were  
232 performed in triplicate, and all the infection experiments were performed at biosafety  
233 level-3 (BSL-3).

234 **Reporting Summary.** Further information on experimental design is available in the  
235 Nature Research Reporting Summary linked to this article.

#### 236 **Data availability**

237 Coordinates and structure factors for SARS-CoV-2 M<sup>pro</sup> in complex with Carmofur  
238 have been deposited in Protein Data Bank (PDB) with accession number 7BUY. Source  
239 data for Fig. 2 are available with the paper online.

#### 240 **References**

- 241 21. Kabsch, W. *XDS. Acta Crystallogr D Biol Crystallogr* **66**, 125-132 (2010).
- 242 22. McCoy, A.J. et al. Phaser crystallographic software. *J Appl Crystallogr* **40**, 658-  
243 674 (2007).
- 244 23. Liebschner, D. et al. Macromolecular structure determination using X-rays,  
245 neutrons and electrons: recent developments in Phenix. *Acta Crystallogr D*  
246 *Struct Biol* **75**, 861-877 (2019).
- 247 24. Emsley, P., Lohkamp, B., Scott, W.G. & Cowtan, K. Features and development  
248 of Coot. *Acta Crystallogr D Biol Crystallogr* **66**, 486-501 (2010).
- 249 25. Afonine, P.V. et al. Towards automated crystallographic structure refinement  
250 with phenix.refine. *Acta Crystallogr D Biol Crystallogr* **68**, 352-67 (2012).

#### 251 **Acknowledgements**

252 We are grateful to the staff at the BL17U1, BL18U1 and BL19U1 at Shanghai  
253 Synchrotron Radiation Facility (SSRF, China), where data was collected. This work  
254 was supported by grants from National Key R&D Program of China (grants No.  
255 2017YFC0840300 and 2020YFA0707500 to Z.R.), Project of International

256 Cooperation and Exchanges NSFC (grant No. 81520108019 to Z.R.), Science and  
257 Technology Commission of Shanghai Municipality (grant No. 20431900200),  
258 Department of Science and Technology of Guangxi Zhuang Autonomous Region (grant  
259 No. 2020AB40007), and the Natural Science Foundation of China (grant No.  
260 31970165).

#### 261 **Author contributions**

262 H.Y. and Z.R. conceived the project; Z.J., Y.Zhao, H.Y. and Z.R. designed the  
263 experiments; Z.J., Y.Zhao, H.W., Y.Zhu, C.Z., X.D., J.Y. and Xiuna Yang cloned,  
264 expressed, purified and crystallized proteins; Y.Zhao, Z.J., B.Z. and T.H. collected the  
265 diffraction data; Y.Zhao, B.Z. and X.L. solved the crystal structure; Y.S. and Y.W.  
266 performed cell-based antiviral and cytotoxicity assays; Y.D. and L.Z. performed qRT-  
267 PCR and cytotoxicity assay analysis; Z.J., Y.Zhao, Y.D., Xiaobao Yang, K.Y., X.L.,  
268 L.W.G., G.X., L.Z., H.Y. and Z.R. analyzed and discussed the data; Z.J., Y.Zhao, K.Y.,  
269 L.W.G., L.Z., H.Y. and Z.R. wrote the manuscript.

#### 270 **Competing interests**

271 The authors declare no competing interests.

272

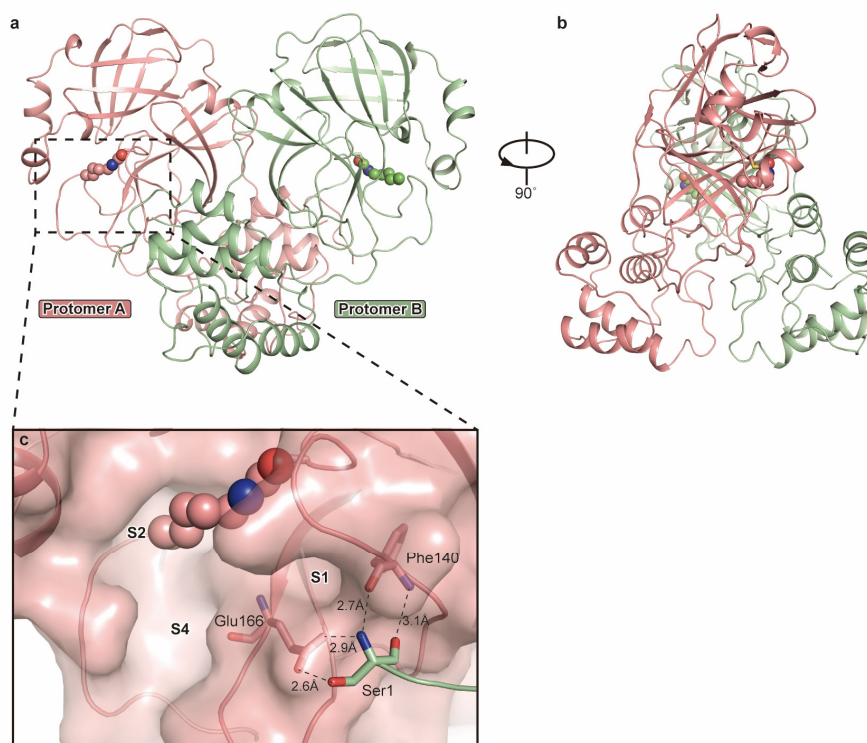

273

274 **Extended Data Fig. 1 | Overall structure of SARS-CoV-2 M<sup>pro</sup> in complex with**  
275 **Carmofur. a,** The overall structure of SARS-CoV-2 M<sup>pro</sup> in complex with Carmofur.  
276 The salmon and green represent the different protomers. The Carmofur atoms are  
277 shown as solid spheres. **b,** The side view of the complex. **c,** The first serine participates  
278 in the formation of the dimer.

279

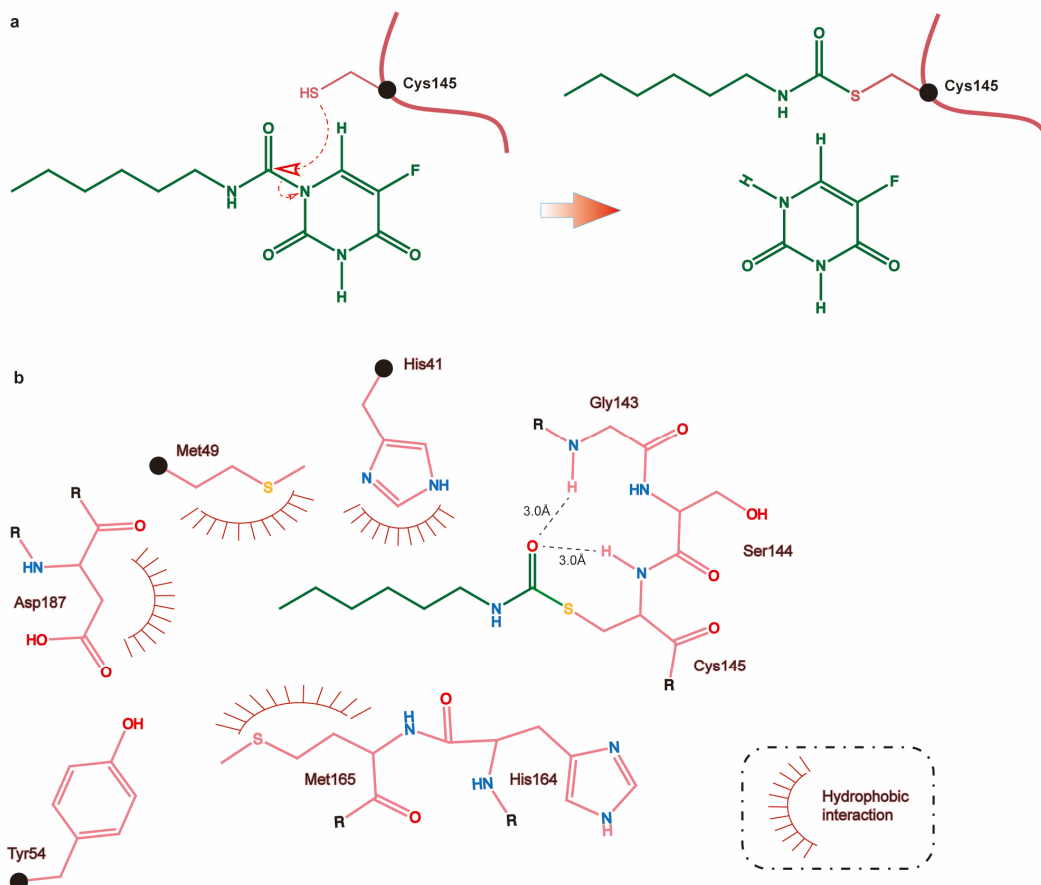

281 **Extended Data Fig. 2 | Inhibition of M<sup>pro</sup> by Carmofur. a**, Putative inhibition  
282 mechanism. Red curve represents M<sup>pro</sup> polypeptide and the black sphere represent the  
283 C $\alpha$  of C145. **b**, Schematic diagram of M<sup>pro</sup>-Carmofur interactions. Black spheres  
284 represent C $\alpha$  atoms.  
285

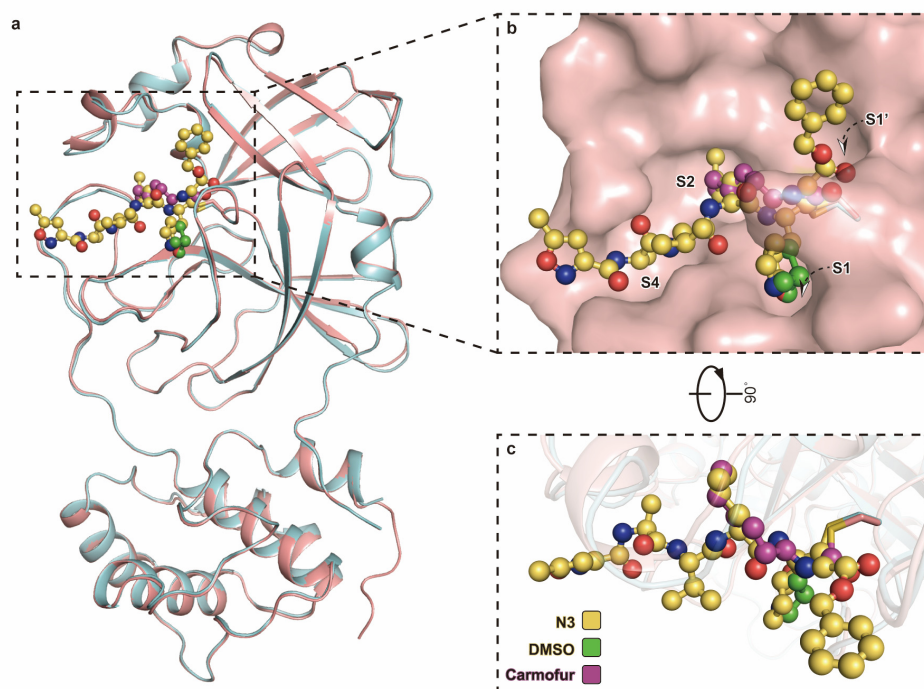

286

287 **Extended Data Fig. 3 | Binding mode of Carmofur and N3 to M<sup>pro</sup>.** **a**, Overall  
288 structural comparison between the M<sup>pro</sup>-Carmofur and M<sup>pro</sup>-N3 complexes. The salmon  
289 cartoon represents the Carmofur bound structure and the light cyan represents the N3  
290 bound structure. Carmofur, N3 and DMSO are represented by the purple, yellow and  
291 blue and green balls and sticks, respectively. **b**, The binding pocket of M<sup>pro</sup>. Carmofur and N3  
292 are represent in the same way as in panel **a**. **c**, Schematic diagram of Carmofur and N3.  
293



294 **Supplementary Table 1. Data collection and refinement statistics.**

| PDB code: 7BUY                                      |                                        |
|-----------------------------------------------------|----------------------------------------|
| <b>Data Collection</b>                              |                                        |
| Space group                                         | <i>C</i> 2                             |
| Cell dimensions                                     |                                        |
| <i>a</i> , <i>b</i> , <i>c</i> (Å)                  | 98.03, 81.65, 51.64                    |
| $\alpha$ , $\beta$ , $\gamma$ (°)                   | 90, 114.88, 90                         |
| Resolution (Å)                                      | 25.64 - 1.6 (1.66 - 1.60) <sup>a</sup> |
| <i>R</i> <sub>merge</sub>                           | 0.03824 (0.5052)                       |
| <i>R</i> <sub>meas</sub>                            | 0.04164 (0.5474)                       |
| <i>R</i> <sub>pim</sub>                             | 0.01622 (0.2089)                       |
| <i>I</i> / $\sigma$ <i>I</i>                        | 24.05 (3.60)                           |
| <i>CC</i> <sub>1/2</sub>                            | 0.999 (0.946)                          |
| Completeness (%)                                    | 99.79 (99.96)                          |
| Redundancy                                          | 3.4 (3.4)                              |
| <b>Refinement</b>                                   |                                        |
| Resolution (Å)                                      | 25.64-1.6                              |
| No. reflections                                     | 48563 (4843)                           |
| <i>R</i> <sub>work</sub> / <i>R</i> <sub>free</sub> | 0.1859 / 0.2034                        |
| No. atoms                                           |                                        |
| Protein                                             | 2367                                   |
| Ligand/ion                                          | 29                                     |
| Water                                               | 205                                    |
| <i>B</i> factors                                    |                                        |
| Protein                                             | 37.91                                  |
| Ligand/ion                                          | 52.55                                  |
| Water                                               | 46.4                                   |
| R.m.s. deviations                                   |                                        |
| Bond lengths (Å)                                    | 0.016                                  |
| Bond angles (°)                                     | 1.37                                   |
| Methods                                             |                                        |
| Ramachandran (%)                                    |                                        |
| Favored                                             | 97.37                                  |
| Allowed                                             | 2.63                                   |
| Outliers                                            | 0                                      |

Data was collected from a single crystal. <sup>a</sup> Values in parentheses are for highest-resolution shell.
